# Supplementary material for: AFP ratio predicts HCC recurrence after liver transplantation
Source: PLoS One. 2020 Jul 2;15(7):e0235576. doi: 10.1371/journal.pone.0235576 (PMC7332004; doi:10.1371/journal.pone.0235576)
Supplement: S1 Data — (XLSX) [file pone.0235576.s002.xlsx]

## Sheet: Dataset HCC
ID	gender (female = 1, male = 2)	status(alive = 1, deceased = 2)	year of birth	age at LT (years)	survival after LT (months)	height (cm)	weight (kg)	HBsAg (positive = 1, negative = 2)	anti-HBc (positive = 1, negative = 2)	anti-HIV (positive = 1, negative = 2)	anti-CMV (positive = 1, negative = 2)	diabetes mellitus (positive = 1, negative = 2)	HbA1c (%)	CKD (positive = 1, negative = 2)	Date LT (year)	CIT (hour)	living donor (positive = 1, negative = 2)	age donor (years)	gender donor (female = 1, male = 2)	anti-HBc donor (positive = 1, negative =2)	CMV donor (positive = 1, negative = 2)	split liver graft (positive = 1, negative = 2)	hospital-based allocation (yes = 1, no = 2)	etiology of liver disease:	hepatitis B	hepatitis D	hepatitis C	hepatitis B and C	alcohol	hepatitis B and D	hepatitis B and C and D	hepatitis B and alcohol	hepatitis C and alcohol	alcohol and NASH	alcohol and cryptogenic	hepaitis B and C and alcohol	others*	HCC recurrence (yes = 1, no = 2)	waiting time HCC diagnosis until LT (months)	SE criteria at listing (yes = 1, no = 2)	SE criteria at LT (yes = 1, no = 2)	SE-Meld before LT	labMELD before LT	Milan criteria at LT (yes = 1, no = 2)	Milan criteria at initial diagnosis (yes = 1, no = 2)	AFP at LT(ng/ml)	GFR (MDRD)	dialysis before LT (yes = 1, no = 2)	T stage
1	2	2	1955	48	79	180		2	1	2	1	2		2	2003	7.95	2	51	1			2	2		1	2	2	2	2	2	2	2	2	2	2	2	2	1	5	1	1	22	14		1	65.4		2	2
2	1	2	1941	68	13	157	87				1	1	6.5	2	2009	5.33	2	12	2		1	2	2		1	2	2	2	2	2	2	2	2	2	2	2	2	1	8	2	1	28	8	1	1	60500	119.9	2	3
3	2	2	1951	60	15	178		2	1			2		2	2011	9.517	2	71	2		1	2	2		2	2	2	2	2	2	2	1	2	2	2	2	2	1	34	2	1	31	6	1	2	3.2		2	2
4	2	2	1950	60	22	170	120		1		1	1	5.93	1	2010	10.917	2	76	1		1	2	1		2	2	2	2	2	2	2	1	2	2	2	2	2	1	0	2	2		12			9.1	78.9	2	2
5	1	1	1957	53	92	165	72	2	2	2	1	1	6.4	1	2011	6.733	2	48	1		2	2	2		2	2	1	2	2	2	2	2	2	2	2	2	2	1	16	1	1	25	7	1	1	20.6	79.6	2	2
6	2	2	1955	53	4	183	86	2	2		1	1		1	2009	10	2				1	2	2		2	2	1	2	2	2	2	2	2	2	2	2	2	1	6	2	2		13	2	2	25.8	76	2	3
7	1	2	1959	43	16						1	2		2	2003	12.367	2	81	1		2	2	2		2	2	1	2	2	2	2	2	2	2	2	2	2	1	6	2	2		12	2	2	9	60.5	2	3
8	2	2	1957	53	43	178	103	2	2		2	2		2	2011	0.267	1	53	2		2	1	2		2	2	1	2	2	2	2	2	2	2	2	2	2	1	7	2	1	25	9	2	2	35.3	67.9	2	3
9	2	2	1956	56	36	181	78	2	1	2	1	1	6.4	1	2012	9.817	2	74	1		1	2	2		2	2	1	2	2	2	2	2	2	2	2	2	2	1	16	1	1	31	13	1	1	67.9	65.1	2	3
10	2	2	1952	59	36	176	90	2	2		1	2		1	2012	12.933	2	70	2		1	2	1		2	2	1	2	2	2	2	2	2	2	2	2	2	1	12		1	22	11	1		382.4	146.3	2	2
11	2	2	1967	42	51	172	85				1	2	5.07	1	2010	9.883	2	70	1		1	2	2		2	2	2	2	2	2	2	2	1	2	2	2	2	1	12	1	1	29	22	1	1	5	33.2	1	3
12	2	2	1956	52	58	176	78	2	1	2	1	1	6.3	2	2009	11.733	2	19	1		1	2	2		2	2	2	1	2	2	2	2	2	2	2	2	2	1	11	1	1	29	9	1	1	2390	90.7	2	3
13	2	2	1948	60	14	170	67		1			2		2	2009	6.75	2	72	2		2	2	2		2	2	2	1	2	2	2	2	2	2	2	2	2	1	9	1	1	28	6	1	1	52.8	76.6	2	2
14	2	2	1950	59	62	163	64		1		1	2	4.74	1	2010	10	2	68	1		2	2	2		2	2	2	1	2	2	2	2	2	2	2	2	2	1	13	1	1	29	10	1	1	4427	102.2	2	3
15	2	2	1959	50	67	182	74	2	1		1	2		2	2009	9.417	2	43	2		1	2	2		2	2	2	2	2	2	1	2	2	2	2	2	2	1	2	2	2		15	2	2	40022	106.9	2	3
16	2	2	1945	62	33	173	84	2				2		2	2007	12.4	2	56	1		2	2	2		2	2	2	2	1	2	2	2	2	2	2	2	2	1	0	2	2		30			25.5	55	2	3
17	1	2	1950	60	35	172	77	2	2		1	1		1	2010	6.633	2	35	2		1	2	2		2	2	2	2	1	2	2	2	2	2	2	2	2	1	30	2	1	29	8	1	2	33.8	80.5	2	2
18	2	2	1942	67	20	193	85	2	1		1	1	6.96	2	2010	11.233	2	69	2		1	2	2		2	2	2	2	2	2	2	2	2	2	2	2	1	1	11	1	1	28	22	1	1	5.2	72.8	2	2
19	2	1	1963	52	48	183	74	1	1	1	1	2	5.15	2	2015	8.25	2	67	2		1	2	2		1	2	2	2	2	2	2	2	2	2	2	2	2	1	26	1	1	25		1	1	6.7	77.6	2	0
20	2	1	1956	45	209	170	90	2	1			2		2	2001	9.183	2	16	2			2	2		1	2	2	2	2	2	2	2	2	2	2	2	2	2											1
21	2	1	1949	54	179	171	90	2	1	2	1	2		1	2004	14	2	50	2	1	1	2	2		1	2	2	2	2	2	2	2	2	2	2	2	2	2					8	2		84	83.6	2	2
22	2	1	1948	50	250	168	63	1	1		1	2		2	1998	9.95	2	50	2			2	2		1	2	2	2	2	2	2	2	2	2	2	2	2	2	5					2	2	11.8
23	2	1	1945	61	137	174	80	2	1	1	1	2		1	2007	9.667	2	79	2		1	2	2		1	2	2	2	2	2	2	2	2	2	2	2	2	2	30	2	1	22	8	1	2	2.1	74.2	2	3
24	1	2	1937	63	211	163		1			1	2		1	2001	9.017	2	50	2			2	2		1	2	2	2	2	2	2	2	2	2	2	2	2	2
25	2	1	1957	55	76	178	78	2	1	2	2	2		2	2012	14.267	2	47	2		2	2	2		1	2	2	2	2	2	2	2	2	2	2	2	2	2	14	1	1	33	8	1	1	11.3	93.6	2	2
26	1	1	1947	49	264	168	61	2	1			2		1	1997										2	2	2	2	2	1	2	2	2	2	2	2	2	2						1					1
27	2	1	1935	68	176	164	74	2	1		2	2		1	2004	8.95	2	63	2		1	2	2		2	2	2	2	2	1	2	2	2	2	2	2	2	2	0	2	2		11			33.9	69.8	2	1
28	2	1	1953	62	34	162	53.4	1	1	2	1	2		1	2016	8.167	2	68	2			2	2		2	2	2	2	2	1	2	2	2	2	2	2	2	2	9	1	1	31	17	1	1	8.2	118.2		2
29	2	1	1970	40	90	180		2	1		2	2		2	2011	10.983	2	61	2		1	2	2		2	2	2	2	2	1	2	2	2	2	2	2	2	2	15	1	1	33	9	1	1	7.6	95.9	2	0
30	1	2	1957	54	4	165						2		2	2012	12.467	2	73	2			2	2		2	2	2	2	2	1	2	2	2	2	2	2	2	2	9	1	1	29	11	1	1	4.4	59.8	2	1
31	2	1	1959	47	153	173	104	1	1	2	1	1		2	2006	11.217	2	75	2		1	2	2		2	2	2	2	2	2	2	1	2	2	2	2	2	2	2	1	1		27	1	1	2.1		2	1
32	2	1	1959	50	108	184	94				1	2	5.45	1	2010	6	2	69	1		1	2	2		2	2	1	2	2	2	2	2	2	2	2	2	2	2	9	1	1	28	10	1	1	83.5	100	2	0
33	1	1	1948	64	74	159	60	2	1		1	1	5.6	1	2012	8.833	2	80	2		1	2	2		2	2	2	1	2	2	2	2	2	2	2	2	2	2	12	2	1	31	9	1	1	5.7	75.5	2	3
34	1	1	1951	58	109	162	67	2	2	2	1	2	5.12	1	2010	1.083	2	71	2		2	2	2		2	2	1	2	2	2	2	2	2	2	2	2	2	2	15	1	1	31	12	1	1	13.4	35.7	2	0
35	2	1	1960	54	48	169	80	2	2	2	1	1	6.3	2	2015	6.733	2	75	1		2	2	2		2	2	1	2	2	2	2	2	2	2	2	2	2	2	12	1	1	29	10	1	1	85.8	80.7	2	1
36	2	1	1957	53	86	178	64				2	2	4.93	1	2011	7.567	2	17	1		1	2	2		2	2	1	2	2	2	2	2	2	2	2	2	2	2	18	1	1	34	14	1	1	8.2	57.5	2	0
37	2	2	1961	54	7	180	93	2	2	2	1	1	6.82	1	2015	11.283	2	50	2		1	1	2		2	2	1	2	2	2	2	2	2	2	2	2	2	2	12	1	1	29	10	1	1	78	86.8	2	1
38	2	1	1956	58	50	170	58	2	2	2	1	2	4.9	2	2014	11.317	2	22	2	2	2	2	2		2	2	1	2	2	2	2	2	2	2	2	2	2	2	9	1	1	28	7	1	1	6	93	2	1
39	2	1	1955	61	33	174	88	2	2	2	2	1		2	2016	8.75	2	51	2		2	2	2		2	2	1	2	2	2	2	2	2	2	2	2	2	2	15	1	1	29	14	1	1	5.4	99.7	2	0
40	2	2	1953	55	92	188	66	2	1	2	1	2		2	2009	8.55	2	59	2		1	2	2		2	2	2	2	2	2	2	2	2	2	2	1	2	2	9	1	1	28	8	1	1	17.3	108.2	2	0
41	2	1	1949	66	42	168	110	2	2	2	1	2	4.88	2	2015	6.833	2	19	2		2	2	2		2	2	1	2	2	2	2	2	2	2	2	2	2	2	27	1	1	28	8	1	2	24.4	95	2	2
42	2	1	1950	65	37	163	64	2	1	2	1	2		2	2015	9.417	2	46	1			2	2		2	2	1	2	2	2	2	2	2	2	2	2	2	2	28	1	1	31	8	1	1	9.2	106.2	2	0
43	1	1	1958	55	71	151	95	2	1	2	1	2		1	2013	10.967	2	57	1		2	2	2		2	2	1	2	2	2	2	2	2	2	2	2	2	2	5	1	1	33	10	1	1	46.6	94.6	2	1
44	2	1	1955	53	116	180		2	1	2	1	2		1	2009	12.333	2	47	2		1	2	2		2	2	2	1	2	2	2	2	2	2	2	2	2	2	7	1	1	28	20	1	1	3.7	101.6	2	1
45	1	1	1964	46	94	161	52	2	2	2	1	2		2	2011	5.417	2	85	1		1	2	2		2	2	1	2	2	2	2	2	2	2	2	2	2	2	23	2	1	34	7	1	2	42.1	77.2	2	1
46	2	2	1955	57	65	172	78	2	1	2	2	2	5.2	2	2013	10.75	2	70	2	2	1	2	2		2	2	2	1	2	2	2	2	2	2	2	2	2	2	13	1	1	28	13	1	1	4.6	120	2	0
47	1	1	1949	58	140	153	72	2	2	2	1	1	7.7	2	2007	10.75	2	66	1		1	2	2		2	2	1	2	2	2	2	2	2	2	2	2	2	2	25	1	1		9	1	1	2.8	120	2	1
48	1	1	1951	59	106	159	67	2	2	2	1	1	4.87	1	2010	12.4	2	54	2		1	2	2		2	2	1	2	2	2	2	2	2	2	2	2	2	2	13	2	1	31	23	1	1	50.3	41.6	2	0
49	2	1	1951	60	77	168	55	2	2	2	2	1	5.9	2	2012	8.083	2	85	1		1	2	2		2	2	1	2	2	2	2	2	2	2	2	2	2	2	18	1	1	34	6	1	1	13.7	97.2	2	1
50	2	1	1966	43	103	179		2	2	2	2	1		2	2010	11.15	2	75	1		1	2	2		2	2	1	2	2	2	2	2	2	2	2	2	2	2	12	1	1	31	28	1	1	17.7	87.6	2	2
51	2	1	1952	54	146	176	96	2	1	2	1	2		2	2006	18	2	65	2	2	1	2	2		2	2	1	2	2	2	2	2	2	2	2	2	2	2	27		2		7	2		11.5	107.3	2	0
52	1	1	1955	56	79	169	60	2	1	2	1	2		1	2012	10.667	2	69	1		1	2	2		2	2	1	2	2	2	2	2	2	2	2	2	2	2	13	2	1	33	23	1	1	18.9	17.2	2	1
53	1	1	1959	52	86	168	60	2	2	2	1	2		1	2011	5.95	2	13	1		1	2	2		2	2	1	2	2	2	2	2	2	2	2	2	2	2	5	2	1	23	9	1	1	36.4	82.4	2	0
54	1	1	1956	57	50	167	68.5	2	1	2	1	2		2	2014	13.017	2	18	2	2	1	1	2		2	2	1	2	2	2	2	2	2	2	2	2	2	2	14	1	1	29	8	1	1	34.8		2	0
55	1	2	1945	58	98	153	90	2	2	2	1	1		1	2004	5.75	2	78	1	1	1	2	2		2	2	1	2	2	2	2	2	2	2	2	2	2	2	6				14	1		7.4	97.1	2	2
56	2	2	1953	57	16	190					1	2		2	2011	5.3	2	73	2		2	2	1		2	2	1	2	2	2	2	2	2	2	2	2	2	2	0	2	2		21			1.7	49	2	1
57	2	2	1955	53	6	178	75	2	1		2	2		2	2008	11.933	2	55	2		1	2	2		2	2	1	2	2	2	2	2	2	2	2	2	2	2	37	2	1	31	8	1		24.8	122	2	2
58	1	2	1954	53	54	154	69				1	2		1	2007	11.483	2	47	1		1	2	2		2	2	1	2	2	2	2	2	2	2	2	2	2	2					13	1	1	60.8	115.6	2	0
59	1	2	1950	57	47	168	69		1		1	1		2	2008	9.667	2	50	1		2	2	2		2	2	2	1	2	2	2	2	2	2	2	2	2	2	11	1	1	28	15	1	1	2.9	87.7	2	2
60	2	2	1945	61	31	176	74	2	1			2	3.8	1	2006	9.317	2	58	2			2	2		2	2	1	2	2	2	2	2	2	2	2	2	2	2	26	1	1		19	1	1	8.9	114.6	2	2
61	2	2	1948	55	11	176	85	2	1	2	1	1	7.4	2	2004	11.833	2	43	1		1	2	2		2	2	1	2	2	2	2	2	2	2	2	2	2	2					15	1		6	86.5	2	0
62	2	1	1961	47	117	172	86	2	1		1	1	5.4	2	2009	10.967	2			2	2	2	2		2	2	2	1	2	2	2	2	2	2	2	2	2	2	3	2	1	28	28	1	1	17.4	80.5	2	0
63	1	1	1956	52	119	165	64	2	1	2	1	2		1	2009	12.45	2	67	1		1	2	2		2	2	2	1	2	2	2	2	2	2	2	2	2	2	7	1	1	28	12	1	1	20.9	118.6	2	0
64	2	1	1958	55	62	168	71	1	1	2	1	2	5	1	2013	9.333	1	76	1	2	1	2	2		2	2	2	1	2	2	2	2	2	2	2	2	2	2	12	1	1	29	14	1	1	10	104	2	2
65	2	2	1964	42	45	186	80	2	1	2	1	2	3.4	1	2007	9.067	2	70	2		1	2	2		2	2	2	1	2	2	2	2	2	2	2	2	2	2	14	1	1	25	20	1	1	425.1	65.5	2	2
66	1	2	1953	55	54	155	60				1	1	7.6	1	2009	10.167	2	39	2		1	2	2		2	2	2	1	2	2	2	2	2	2	2	2	2	2	13	2	1	31	21	1	2	7	23.8		2
67	1	2	1953	56	11	165	61		1		2	2	5.17	2	2010	0.333	1	51	2			1	2		2	2	2	1	2	2	2	2	2	2	2	2	2	2	13	1	2		12	2	1	6.3	74.7	2	1
68	2	2	1950	57	73	175	85	2	1	2	1	2		1	2008	7	2	47	2		1	2	2		2	2	2	1	2	2	2	2	2	2	2	2	2	2	8	1	1	28	13	1	1	18.2	78.8	2	1
69	2	2	1955	57	24	176		2	1	2	1	2		1	2013	3.833	1	53	1		1	1	2		2	2	2	1	2	2	2	2	2	2	2	2	2	2	11	2	2		10	2	2	4.5	92.9	2	0
70	2	1	1955	48	183	167	78	2	2	2	1	1		1	2003	7.517	2	49	1		1	2	2		2	2	2	2	1	2	2	2	2	2	2	2	2	2	1	2	2		26	1	1	3.6	71.4	2	2
71	1	1	1953	48	211	164	82	2	2	2	1	1	6.8	1	2001	5.517	2	42	1	2	1	2	2		2	2	2	2	1	2	2	2	2	2	2	2	2	2	16				7	1	2	4.2	106.7	2	1
72	2	1	1956	52	120	176	87	2	2		1	2		2	2009	8.383	2	57	2		1	2	2		2	2	2	2	1	2	2	2	2	2	2	2	2	2	0	2	1	25	29			1.5	77.6	2	2
73	2	1	1955	51	137	178	110	2	2	2	2	2		1	2007	10	2	21	2		2	2	2		2	2	2	2	1	2	2	2	2	2	2	2	2	2	6	1	1	25	15	1	1	3.7	102	2	1
74	2	1	1947	60	138	182	120	2	2	2	1	2		2	2007	12.317	2	72	1		1	2	2		2	2	2	2	1	2	2	2	2	2	2	2	2	2	49	1	1	25	14	1	1	2.6	129.9	2	2
75	2	1	1957	53	99	172	71	2		2		1	7.54	1	2010	6.633	2	56	1		1	2	2		2	2	2	2	1	2	2	2	2	2	2	2	2	2	12	1	1	28	11	1	1	6	80	2	1
76	1	1	1944	63	124	164	49					2	3.5	2	2008	6	2	54	1	2	1	2	2		2	2	2	2	1	2	2	2	2	2	2	2	2	2	0	2	2		12			4.6	63.1	2	1
77	2	1	1962	50	80	181	98	2	2	2	1			2	2012	12.4	2	59	2		2	2	2		2	2	2	2	1	2	2	2	2	2	2	2	2	2	16	1	1	33	14	1	1	4.9	139.9	2	1
78	2	1	1940	66	140	172	78	2	2	2	2	2		1	2007	9.617	2	17	1		1	2	2		2	2	2	2	1	2	2	2	2	2	2	2	2	2	4	1	1	24	18	1	1	3.9	70.7	2	0
79	2	1	1948	64	74	176	82	2	2	2	1	1	6.4	1	2012	8.5	2	68	2		1	2	2		2	2	2	2	1	2	2	2	2	2	2	2	2	2	17	1	1	31	15	1	1	1.9	42.5	1	1
80	2	1	1954	52	139	173	94	2	2		2	2	3.4	2	2007	9.95	2	73	2		2	2	2		2	2	2	2	1	2	2	2	2	2	2	2	2	2	0	2	2		18			8	80.3	2	1
81	2	2	1955	53	27	170		2	2	2	2	1		2	2008	9.7	2	47	1		2	2	2		2	2	2	2	1	2	2	2	2	2	2	2	2	2	10	1	1	29	11	1	1	3.2	94.3	2	2
82	1	2	1934	69	33	160					1	2		1	2004	9.85	2	65	1		1	2	2		2	2	2	2	1	2	2	2	2	2	2	2	2	2	0	2	2		15			5.5	76.6	2	1
83	2	2	1946	62	5	170	82	2			2	2	4.3	1	2008	9.083	2				1	2	2		2	2	2	2	1	2	2	2	2	2	2	2	2	2	7	1	1	28	13	1	1	8.1	137	2	0
84	2	2	1941	62	42	178	108	2			2	1		1	2003	8.883	2	23	2			2	2		2	2	2	2	2	2	2	2	1	2	2	2	2	2	4	2	2		25	2	1	2.5	44.3	2	2
85	2	2	1959	56	0	182	100	2	2	2	2	2		2	2015	7.7	2	61	2		1	2	2		2	2	2	2	1	2	2	2	2	2	2	2	2	2	11	1	1	31	7	1	1	3.6	109.4	2	1
86	2	1	1962	53	39	176		2	2	2	2	2		2	2015	9.833	2	53	2		2	2	2		2	2	2	2	2	2	2	2	2	2	1	2	2	2	0	2	2		31			2.9	51.7		1
87	2	1	1946	66	72	185		2	2	2	2	1		2	2013	9.917	2	53	2	2	2	2	2		2	2	2	2	2	2	2	2	2	2	2	2	1	2	27	2	1	39	8	1	1	1.9	102.6	2	0
88	2	1	1968	43	84	187		2	2	2	1	2		1	2012	12.383	2	58	1		2	2	2		2	2	2	2	2	2	2	2	2	2	2	2	1	2	12	2	1	29	15	1	1	4.8	104	2	0
89	1	1	1939	64	178	165	62	2	2	2	1	1	6.2	2	2004	10.7	2	48	2		2	2	2		2	2	2	2	2	2	2	2	2	2	2	2	1	2	0	2	2		14			12.8		2	2
90	1	1	1956	56	77	168	48	2	1	2	1	2	4.7	1	2012	10.75	2	72	2		1	2	2		2	2	2	2	2	2	2	2	2	2	2	2	1	2	18	2	1	34	15	1	2	3	72.1	2	0
91	2	1	1952	62	54	176	80	2	2	2	2	2	5.3	2	2014	10.4	2	52	2	2	1	2	2		2	2	2	2	2	2	2	2	2	2	2	2	1	2	2	1	1	22	11	1	1	4.7	88.9	2	0
92	1	1	1968	44	83	170	60	2	2	2	1	2	5.3	2	2012	10.333	2	69	1	2	1	2	2		2	2	2	2	2	2	2	2	2	2	2	2	1	2	15	1	1	33	6	1	1	3.1	57.6	2	1
93	1	2	1939	63	81	159		2	2		1	1	7.4	1	2003	12.467	2	28	1			2	2		2	2	2	2	2	2	2	2	2	2	2	2	1	2	4				13	1	1	9.3	45.4	2	2
94	2	1	1951	57	119	178	84				1	1	6.8	1	2009	9.95	2	58	1		1	2	2		2	2	2	2	2	2	2	1	2	2	2	2	2	2	16	1	1	28	8	1	1	2.1	110.7	2	1
95	2	1	1945	67	71	172		2	2	2	1	1	6.2	2	2013	11.883	2	84	1		2	2	2		2	2	2	2	2	2	2	2	2	1	2	2	2	2	13	1	1	31	11	1	1	7.4	44.6	2	0
96	2	2	1960	40	74	180	71	1	1	2	1	2		1	2001	6.5	2	37	2		1	2	2		1	2	2	2	2	2	2	2	2	2	2	2	2	2	0				14	1		6.5	82.8	2	3
97	1	2	1949	58	31	157	49	2	2	2	1	2		2	2007	11	2	14	2		1	2	2		2	2	1	2	2	2	2	2	2	2	2	2	2	2	18	1	1	25	8	1	1	47	97.4	2	1
98	1	1	1943	57	215	140		2	1	2	1	1		1	2001	10.833	2	38	1			2	2		1	2	2	2	2	2	2	2	2	2	2	2	2	2						1
99	2	1	1945	55	212	178	88	2	1			2		2	2001		2	47	2			2	2		2	2	2	2	2	1	2	2	2	2	2	2	2	2											1
																																					*NASH; PSC; PBC; cryptogenic; hemochromatosis; autoimmune hepatitis; adenomatosis
[truncated: 17 more columns]
